# Supplementary material
Source: publisher figshare collection journal article supplement (https://springernature.figshare.com/ndownloader/files/31581080)
Supplement: Supplementary file 1 [file 31581080]

Measurement(s),hydrological precipitation process
Technology Type(s),cloud-cover informed downscaling
Factor Type(s),temporal interval • geographic location
Sample Characteristic - Environment,climate system • cloud
Sample Characteristic - Location,global
